# Supplementary material
Source: PubMed Central journal article supplement (PMC3546831)

## Supporting Information

Mechanism of Ammonia-Borane Dehydrogenation Catalyzed by Shvo's Catalyst

Zhiyao Lu, Brian L. Conley and Travis J. Williams\*

Donald P. and Katherine B. Loker Hydrocarbon Research Institute and  
Department of Chemistry, University of Southern California,  
Los Angeles, California, 90089-1661  
travisw@usc.edu

### Contents

|                                                                                            |    |
|--------------------------------------------------------------------------------------------|----|
| I. General Procedures .....                                                                | 2  |
| II. Summary Scheme .....                                                                   | 3  |
| III. Mechanistic Studies Utilizing $^{11}\text{B}$ and $^1\text{H}$ NMR Spectroscopy ..... | 4  |
| A. Representative Procedure for Ammonia Borane Dehydrogenation with Shvo's Catalyst .....  | 4  |
| B. Reduction of <b>18</b> with Ammonia Borane. ....                                        | 5  |
| D. Kinetic Isotope Effect Experiments and H/D Exchange. ....                               | 8  |
| E. Reaction of Complex <b>18</b> with Borazine. ....                                       | 10 |
| F. Synthesis and Reactions of <b>26</b> . ....                                             | 11 |
| G. Ammonia Borane Dehydrogenation in the presence of excess $\text{BH}_3$ . ....           | 12 |
| H. Structure and Kinetic Studies of Ru-NH <sub>3</sub> adduct <b>23</b> . ....             | 14 |
| I. 1,10-Phenanthroline Poisoning Kinetics. ....                                            | 16 |
| IV. References .....                                                                       | 18 |

## I. General Procedures

All air and water sensitive procedures were carried out either in a Vacuum Atmosphere glove box under nitrogen (0.5-10 ppm O<sub>2</sub> for all manipulations) or using standard Schlenk techniques under nitrogen. Deuterated NMR solvents were purchased from Cambridge Isotopes Laboratories. Benzene-*d*<sub>6</sub> and diethylene glycol dimethyl ether (diglyme, J. T. Baker) were dried over sodium benzophenone ketyl and distilled prior to use. Shvo's catalyst was purchased from Strem Chemicals. Ammonia borane (NH<sub>3</sub>BH<sub>3</sub>, AB) was purchased from Sigma Aldrich. Borazine was synthesized and purified by the method used by Wideman and Sneddon.<sup>1</sup> <sup>1</sup>H and <sup>11</sup>B NMR spectra were obtained on a Varian 600 spectrometer (600 MHz in <sup>1</sup>H, 192 MHz in <sup>11</sup>B) with chemical shifts reported in units of ppm. All <sup>1</sup>H chemical shifts are referenced to the residual <sup>1</sup>H solvent (relative to TMS). All <sup>11</sup>B chemical shifts are referenced to a BF<sub>3</sub>-OEt<sub>2</sub> in diglyme in a co-axial external standard (0 ppm). NMR spectra were taken in 8" J-Young tubes (Wilmad) with Teflon valve plugs. The NMR tubes were shaken vigorously for several minutes with chlorotrimethylsilane then dried in vacuo on a Schlenk line prior to use.

*Safety Note. Extreme caution should be used when carrying out these reactions as the release of hydrogen can lead to sudden pressurization of reaction vessels.*

## II. Summary Scheme

Scheme S1 summarizes the conclusions mentioned in Schemes 3 and 10 of the main text.

### Scheme S1. Mechanistic Proposal.

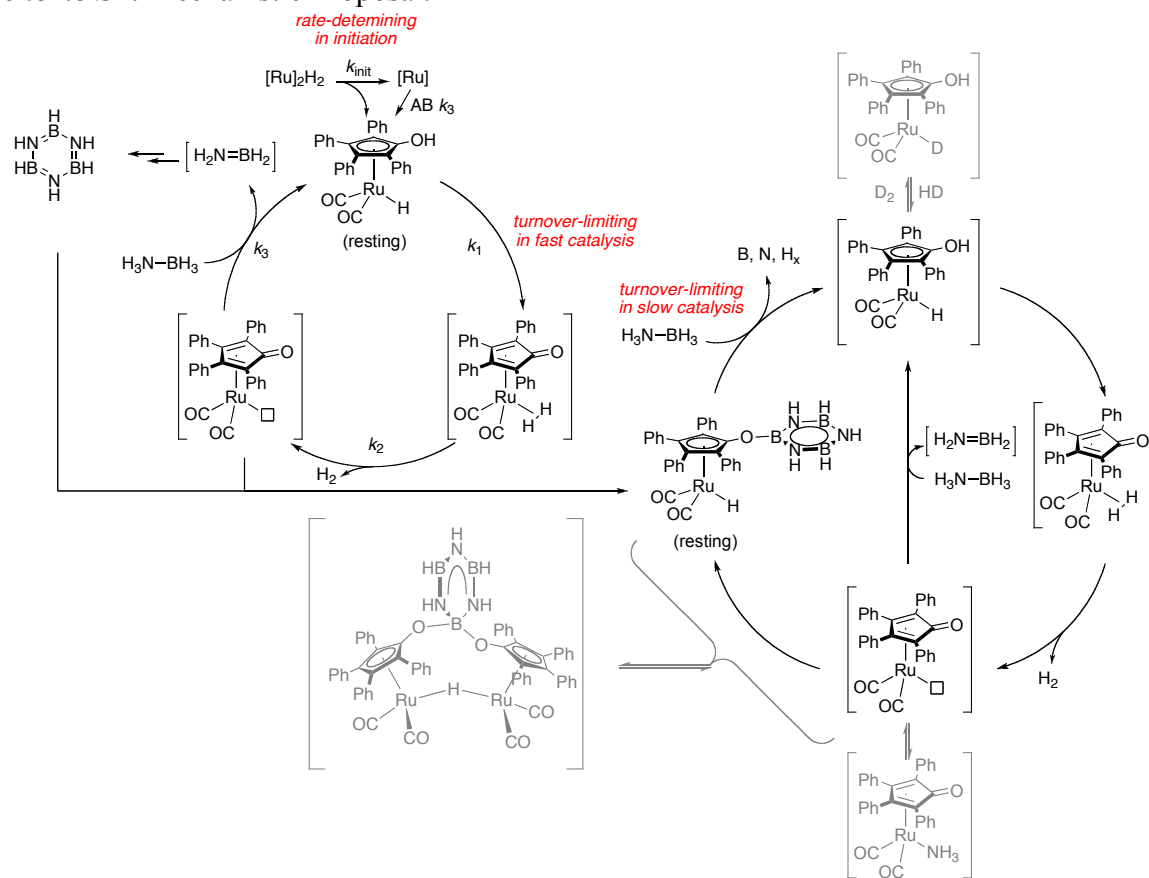

### III. Mechanistic Studies Utilizing $^{11}\text{B}$ and $^1\text{H}$ NMR Spectroscopy

#### *A. Representative Procedure for Ammonia Borane Dehydrogenation with Shvo's Catalyst.*

In a typical reaction, 7.7 mg AB was combined with Shvo's catalyst (**12**, 13.6 mg, 5 mol %) in a 2 mL Schlenk tube equipped with a Teflon stir bar while in a glovebox under nitrogen. The AB concentration and catalyst concentrations may be varied. Diglyme (0.4 mL) and benzene- $d_6$  (0.2 mL) were added to the tube. The sample tube was immediately inserted into a preheated NMR (70 °C) and the kinetic monitoring commenced after quick locking and shimming. Disappearance of AB in the solution was monitored by the relative integration of its characteristic peak in the  $^{11}\text{B}$  spectrum (-22 ppm) and the  $\text{BF}_3\text{-OEt}_2$  standard. All spectra were processed using VNMRJ (v. 2.3). The acquisition involved a 1.67 sec pulse sequence in which 4,096 complex points were recorded, followed by 1 sec relaxation delay. To eliminate B-O peaks from the borosilicate NMR tube and probe, the  $^{11}\text{B}$  FIDs were processed with back linear prediction, ca. 5-15 points.

### B. Reduction of **18** with Ammonia Borane.

In this experiment we show spectra for the reaction in Figure S1.

**Figure S1.**

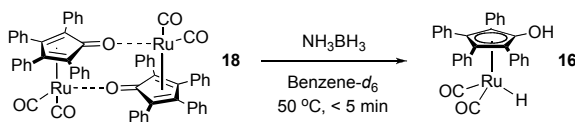

In two J. Young tubes (a and b), 7.7 mg (0.25 mmol) AB and 13.5 mg (5 mol%) **18** were dissolved in 0.6 mL benzene- $d_6$ . A  $^1\text{H}$ -NMR of tube (a) was taken quickly (ca. 1 min) in a pre-locked and shimmed instrument and some reduction reaction already appears (Figure S2 top). Tube (b) was placed in a preheated oil bath at 50 °C for 4 min before quickly taken a  $^1\text{H}$ -NMR of. The NMR spectrum of tube (b) shows completion of conversion of **18** in this system in 5 min (Figure S2 bottom).

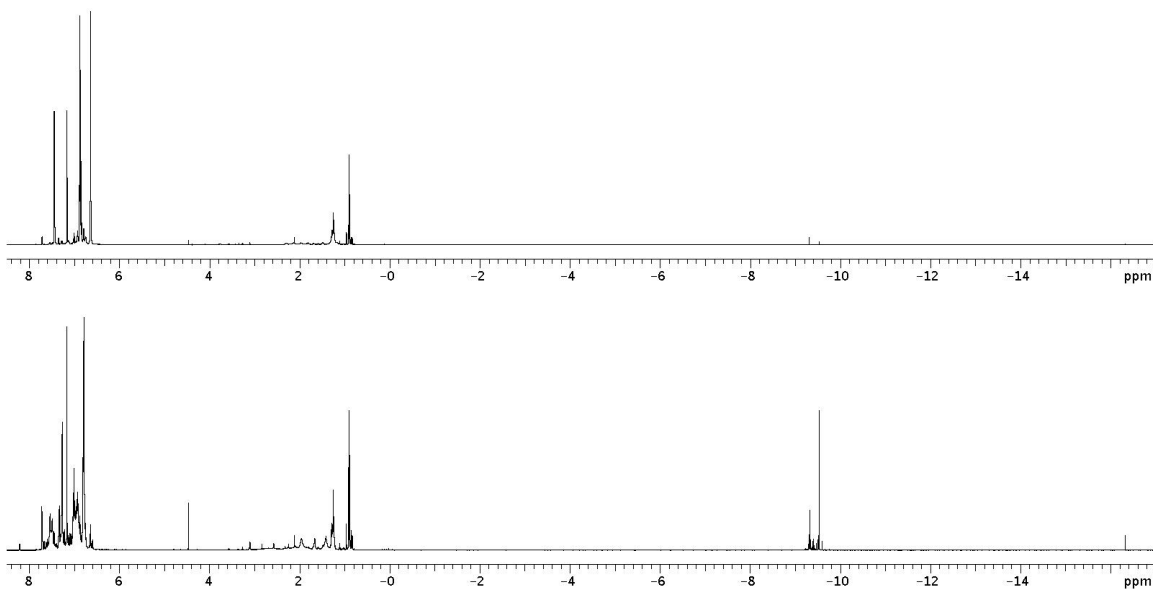

**Figure S2.** 0.42 M AB with 5 mol% **18** in 0.6 mL benzene- $d_6$ . Top: tube (a) at room temperature in 5 min, some conversion of **18** by AB can be observed. Bottom: in tube (b) **18** is fully reduced to Ru—H hydride species in 5 min at 50 °C, suggesting a rate constant  $> 10^{-2}\text{ s}^{-1}$ .

### C. Determination of AB and Catalyst Order in Case 3.

These graphs show raw kinetics data fits for [AB] dependence in the slow catalysis case (Figure S3). These correspond to Table 1 in the main text.

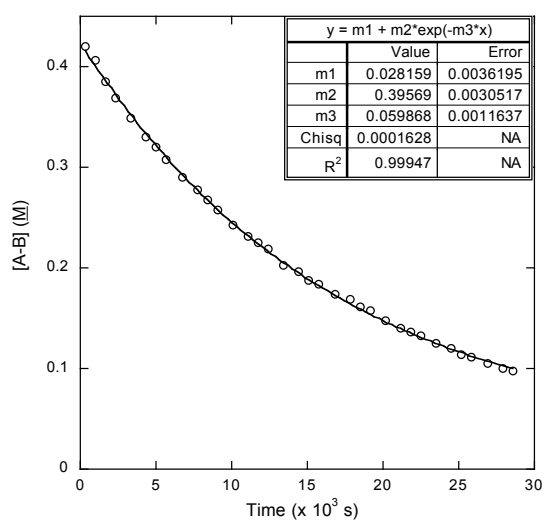

0.42 M AB.  $k_{\text{obs}} = 5.99(12) \times 10^{-5} \text{ s}^{-1}$ .

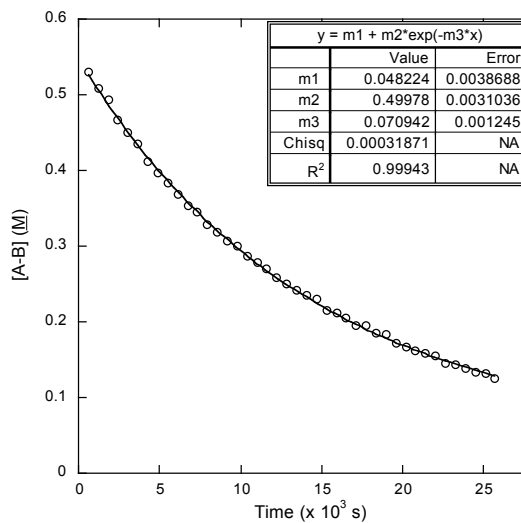

0.53 M AB.  $k_{\text{obs}} = 7.09(12) \times 10^{-5} \text{ s}^{-1}$ .

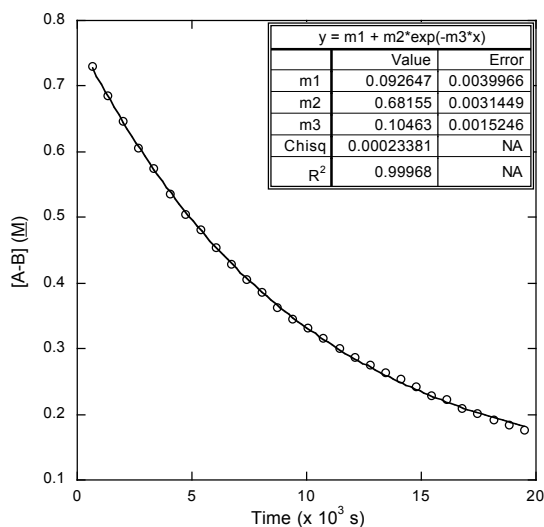

0.73 M AB.  $k_{\text{obs}} = 1.05(2) \times 10^{-4} \text{ s}^{-1}$ .

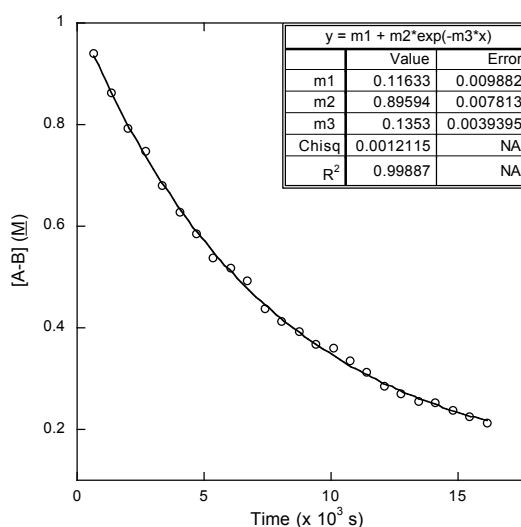

0.94 M AB.  $k_{\text{obs}} = 1.35(4) \times 10^{-4} \text{ s}^{-1}$ .

**Figure S3.** [AB] vs. time monitored by <sup>11</sup>B NMR in 2:1 diglyme/benzene-*d*<sub>6</sub> with varying AB concentrations in the slow catalysis case. Exponential coefficients represent the observed rate constants in s<sup>-1</sup> (× 10<sup>-3</sup>).

These graphs show raw kinetics data for [Ru] dependence in the slow catalysis case (Figure S4). These correspond to Table 1 in the main text.

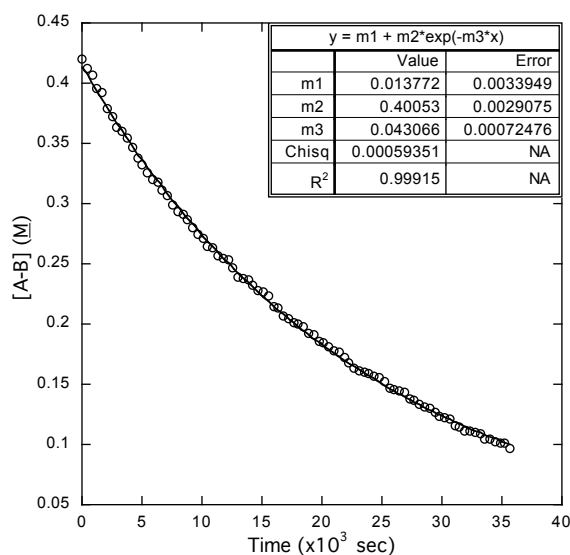

2.5 mol % **12**.  $k_{\text{obs}} = 4.31(1) \times 10^{-5} \text{ s}^{-1}$ .

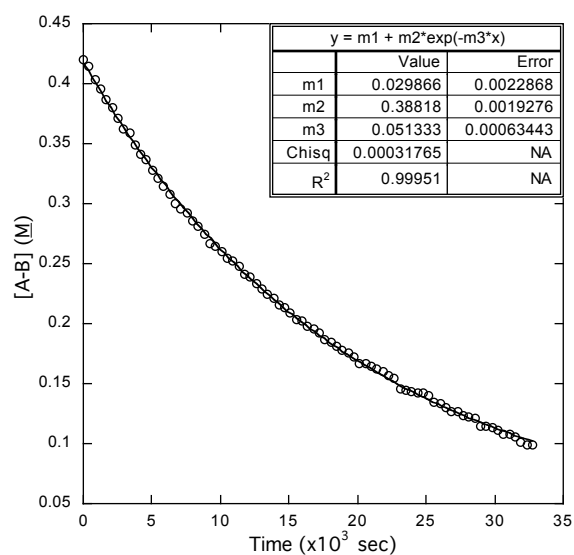

3.75 mol % **12**.  $k_{\text{obs}} = 5.13(6) \times 10^{-5} \text{ s}^{-1}$ .

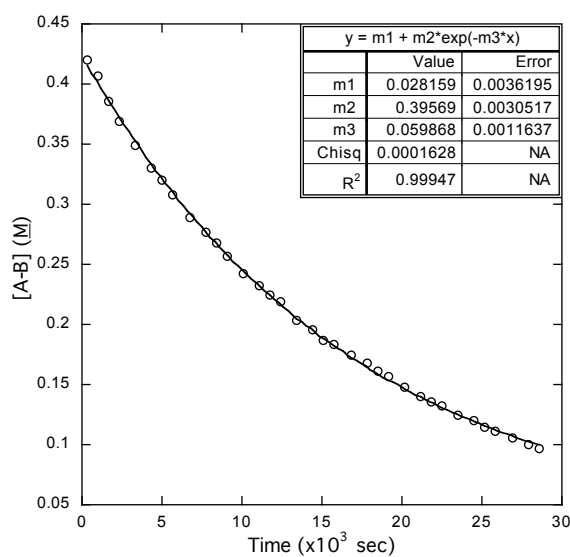

5.0 mol % **12**.  $k_{\text{obs}} = 5.99(12) \times 10^{-5} \text{ s}^{-1}$ .

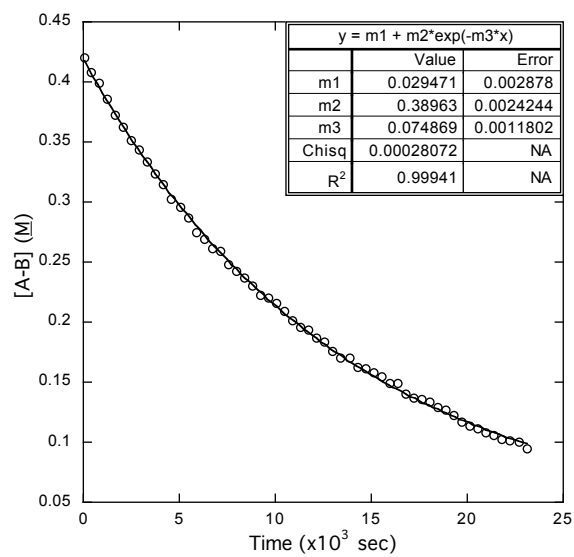

7.5 mol % **12**.  $k_{\text{obs}} = 7.49(12) \times 10^{-5} \text{ s}^{-1}$ .

**Figure S4.** [AB] vs. time monitored by <sup>11</sup>B NMR in 2:1 diglyme/benzene-d<sub>6</sub> with varying catalyst concentrations in the slow catalysis case. Exponential coefficients represent the observed rate constants in s<sup>-1</sup> (× 10<sup>-3</sup>).

D. Kinetic Isotope Effect Experiments and H/D Exchange.

These graphs (Figure S5) show raw data for kinetic isotope effect experiments done on the reaction in case 3.

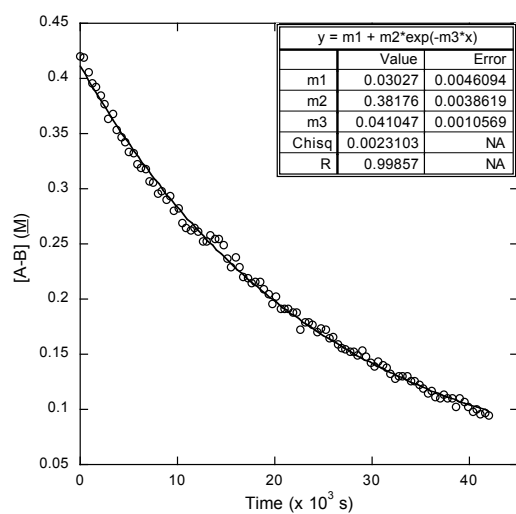

$\text{ND}_3\text{BH}_3, k_{\text{obs}} = 4.10(10) \times 10^{-5} \text{ s}^{-1}$   
 $\text{KIE} = 1.46(3)$

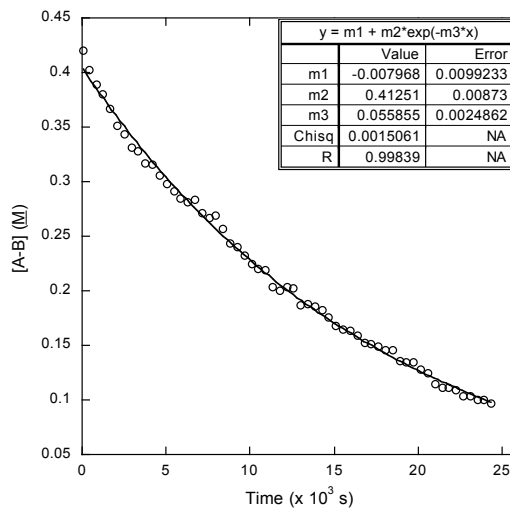

$\text{NH}_3\text{BD}_3, k_{\text{obs}} = 5.59(25) \times 10^{-5} \text{ s}^{-1}$   
 $\text{KIE} = 1.07(5)$

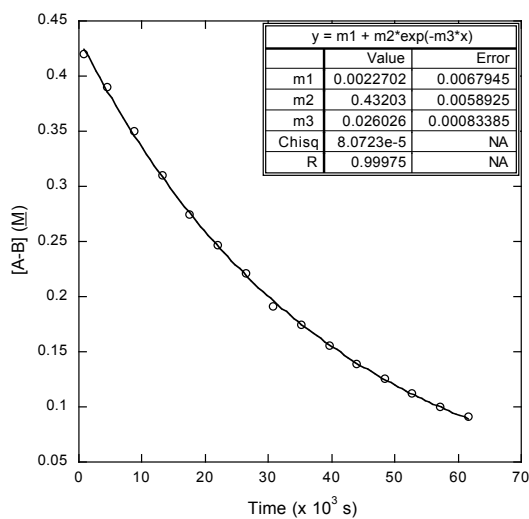

$\text{ND}_3\text{BD}_3, k_{\text{obs}} = 2.60(8) \times 10^{-5} \text{ s}^{-1}$   
 $\text{KIE} = 2.30(4)$

**Figure S5.** Kinetic isotope effects in dehydrogenation by 5 mol % **12**. And HD signal in  $^1\text{H}$  NMR.



Figure S6 illustrates H/D crossover in the course of ammonia borane dehydrogenation.

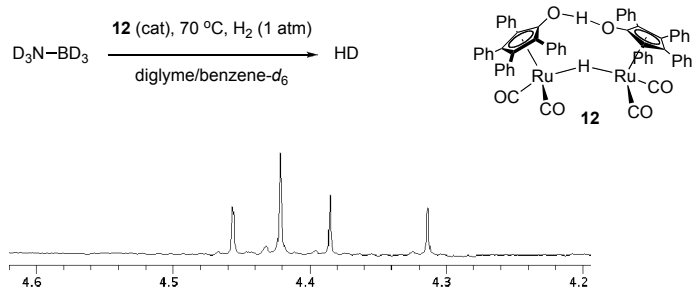

**Figure S6.** HD exchange.  $^1H$  NMR shows  $H_2$  and HD in the hydrogen region,  $J_{HD} = 42.4$  Hz

### E. Reaction of Complex **18** with Borazine.

Figure S7 shows the reaction of **18** with borazine. Figure S7 (middle) shows the hydride region of the  $^1\text{H}$  NMR spectrum of a benzene solution of **18** in a sealed tube after 1 eq. borazine is added and incubated for 5 min at 25 °C. The taller peak in the  $\kappa^1$ -Ru—H hydride region ( $\delta = -9.7$  ppm) corresponds to borazine adduct **21**, and the peak in the  $\mu^2$ -Ru—H hydride region ( $\delta = -18.2$  ppm) corresponds to borazine adduct **31**. Multiple  $\kappa^1$ -Ru—H peaks are observed after 2 hours (shown in Figure S7, bottom). The  $\mu^2$ -Ru—H hydride peak is no longer at presence in the spectrum, and **21**'s peak becomes the tallest in hydride region. Others correspond to other *O*-borylated homologs of **16**, as sketched in Scheme 5 of the main text.

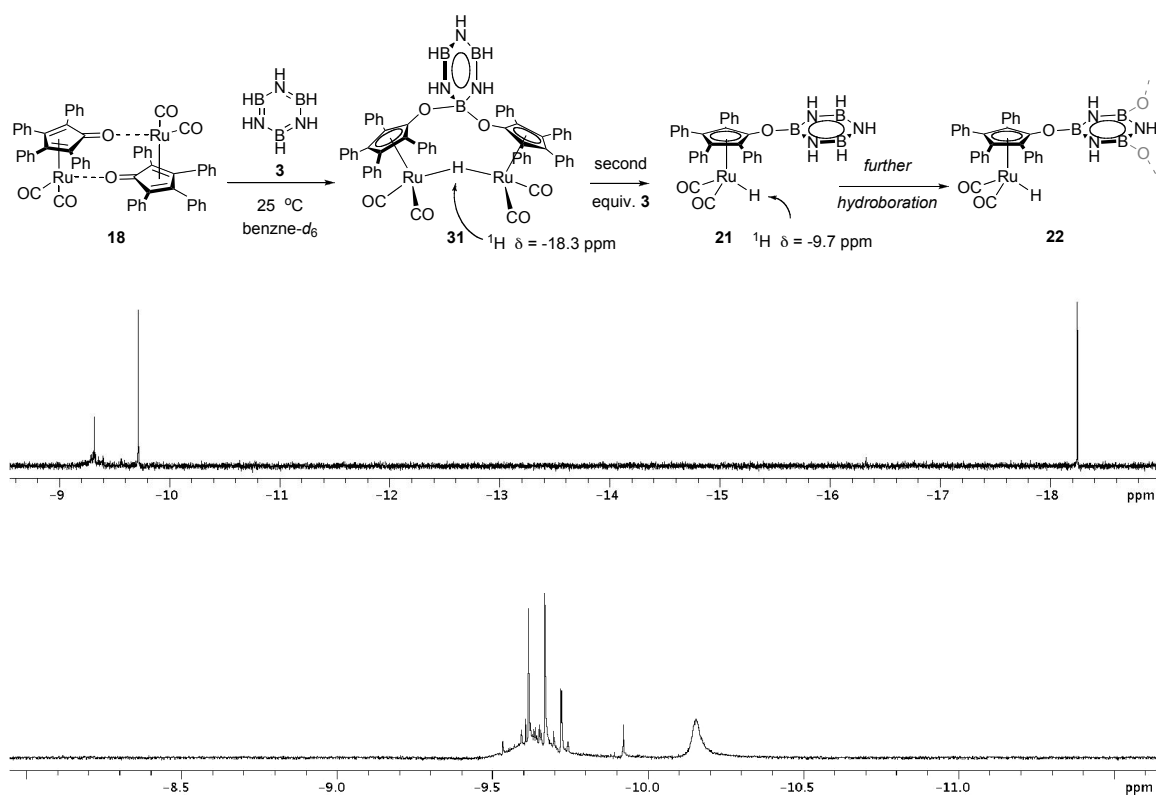

**Figure S7.** Borazine hydroboration of **18**. Top: scheme. Middle:  $^1\text{H}$  NMR in 5 min at 25 °C. Bottom: 2 hours at 25 °C.

F. Synthesis and Reactions of **26**.

**26** was prepared *in situ* by a method introduced by Clark<sup>2</sup> as described in the main text. Data treatments for **26**-catalyzed AB dehydrogenation are shown in Figure S8.

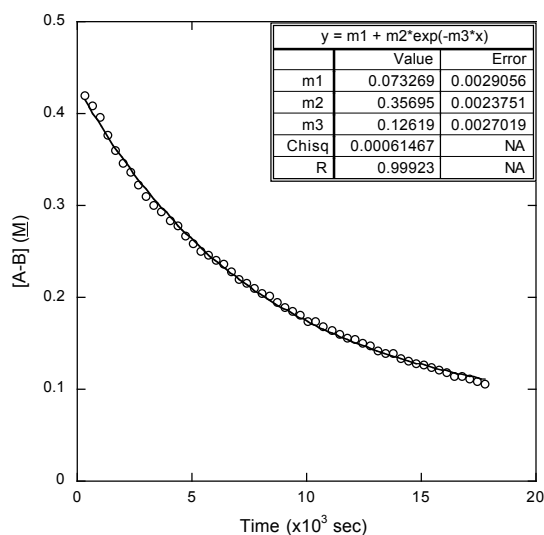

5.0 mol % **26**.  $k_{\text{obs}} = 1.26(3) \times 10^{-4} \text{ s}^{-1}$ .

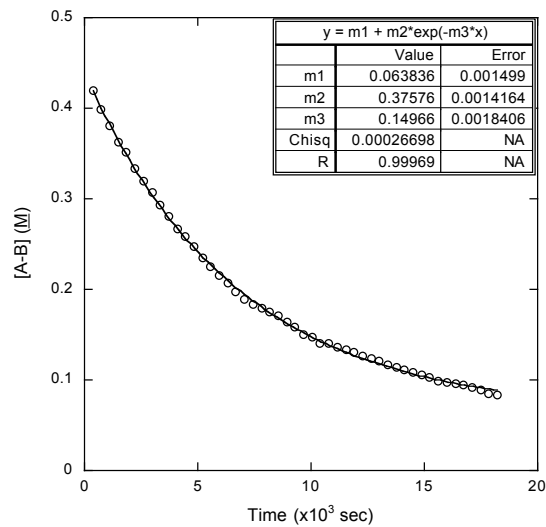

7.5 mol % **26**.  $k_{\text{obs}} = 1.50(2) \times 10^{-4} \text{ s}^{-1}$ .

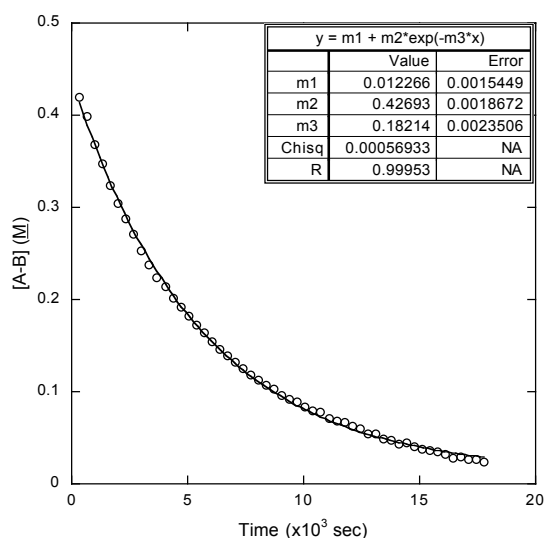

10.0 mol % **26**.  $k_{\text{obs}} = 1.82(2) \times 10^{-4} \text{ s}^{-1}$ .

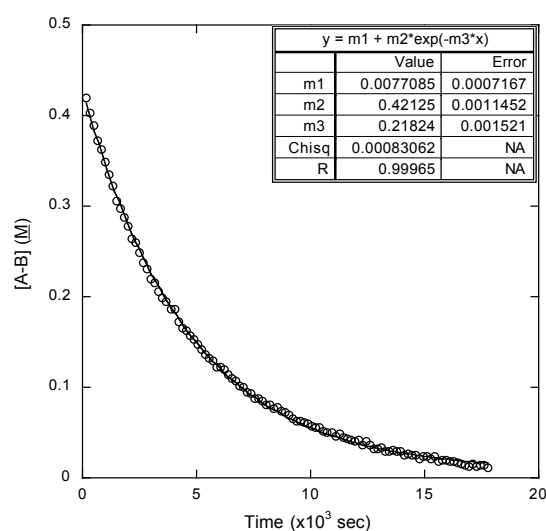

15.0 mol % **26**.  $k_{\text{obs}} = 2.18(2) \times 10^{-4} \text{ s}^{-1}$ .

**Figure S8.** [AB] vs. time monitored by <sup>11</sup>B NMR in 2:1 diglyme/benzene-*d*<sub>6</sub> with varying catalyst **11** concentrations. Exponential coefficients represents the observed rate constants in s<sup>-1</sup> (× 10<sup>-3</sup>).

G. Ammonia Borane Dehydrogenation in the presence of excess  $BH_3$ .

Kinetic experiments in the presence of added  $BH_3$  were conducted as describe in main text. Data fits of these kinetic runs and their control reactions are shown in Figure S9.

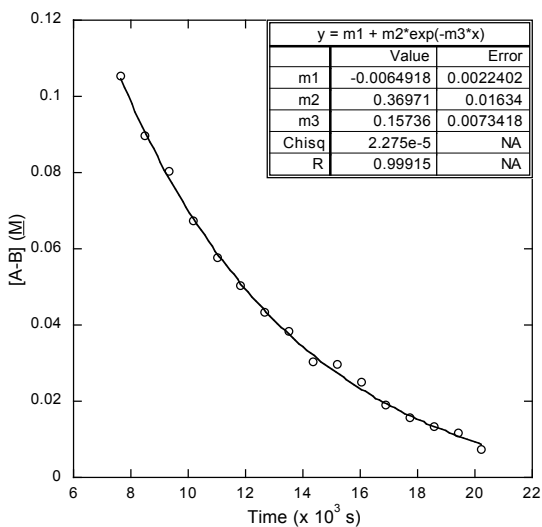

0.5 eq.  $BH_3 \cdot THF$ .  $k_{obs} = 1.57(7) \times 10^{-4} s^{-1}$

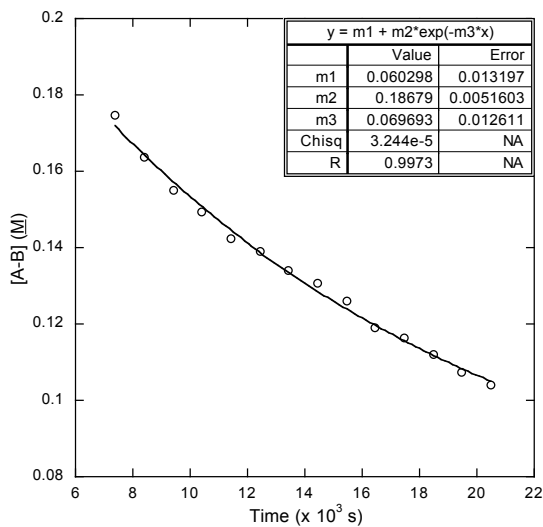

THF only.  $k_{obs} = 7.0(13) \times 10^{-5} s^{-1}$

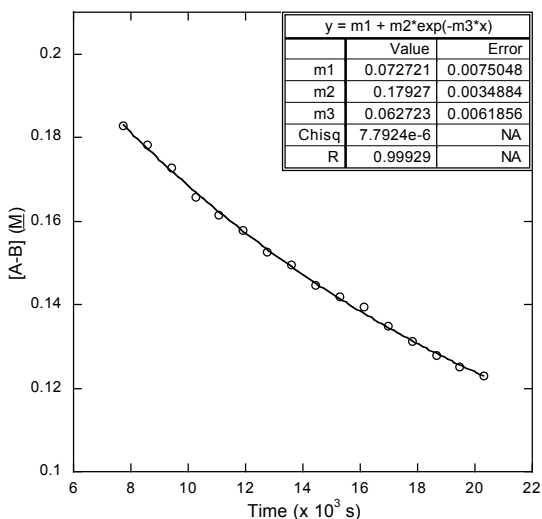

Parent conditions.  $k_{obs} = 6.3(6) \times 10^{-5} s^{-1}$

$^{11}B$  NMR peak of **6**: -26.7 ppm

**Figure S9.** Top:  $[AB]$  vs. time for kinetic runs wherein  $BH_3 \cdot THF$  or THF were added to 5 mol% **12** in 2:1 diglyme/benzene- $d_6$  at 70 °C as monitored by  $^{11}B$  NMR. Exponential coefficients in exponential decay plots represent  $k_{obs}$ . Bottom right:

Figure S10 shows an illustration of the  $^{11}\text{B}\{^1\text{H}\}$  NMR spectrum acquired for the reaction above at 70 °C after 300 s reaction time. The peaks in this  $^{11}\text{B}$  spectrum are **6** (-26.7 ppm), AB (-22 ppm), and  $\text{BF}_3\cdot\text{OEt}_2$  in dyglyme co-axial external standard (0 ppm).

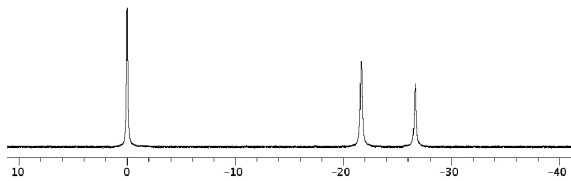

**Figure S10.** A representative  $^{11}\text{B}$  NMR spectrum.

*H. Structure and Kinetic Studies of Ru-NH<sub>3</sub> adduct 23.*

Ru-NH<sub>3</sub> adduct **23** was isolated in 59% yield.<sup>3</sup> <sup>1</sup>H NMR (pyridine-*d*<sub>5</sub>, 600 MHz) and <sup>13</sup>C{<sup>1</sup>H} NMR (pyridine-*d*<sub>5</sub>, 150 MHz) are shown in Figure S11.

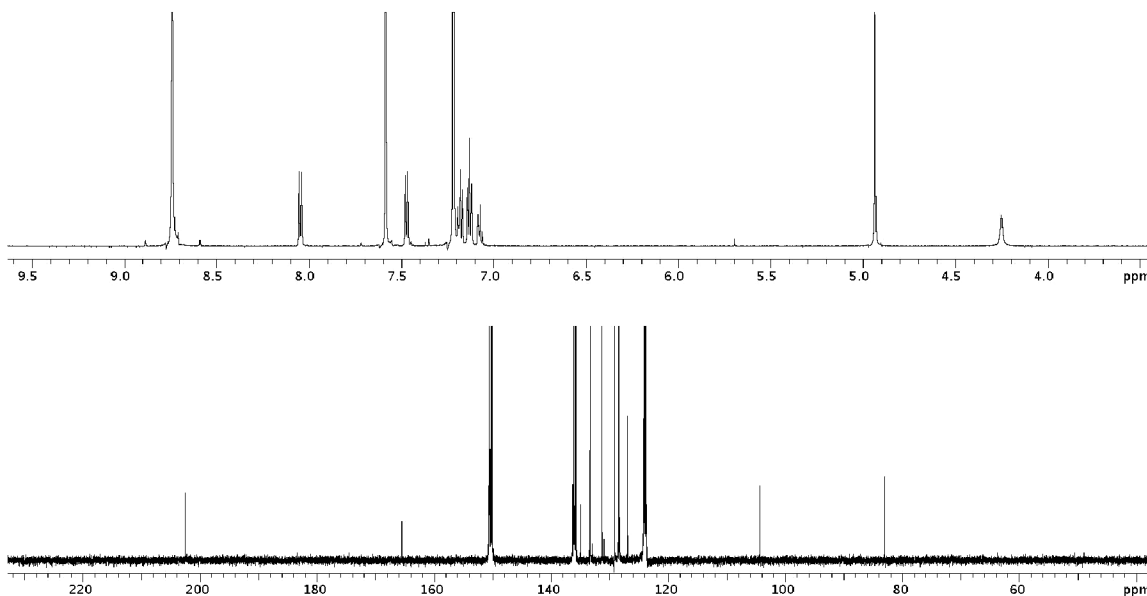

**Figure S11.** <sup>1</sup>H and <sup>13</sup>C NMR of **23** taken in pyridine-*d*<sub>5</sub> at 25 °C.

A reaction between **12** and borazine affords multiple  $\kappa^1$ -Ru—H complexes. Upon removal of all free borazine under vacuum, the reaction mixture was re-dissolved in benzene-*d*<sub>6</sub>. The relative integrations of the  $\kappa^1$ -Ru—H hydride signals and the aryl region in the resulting spectrum show that the products of this reaction comprise > 90%  $\kappa^1$ -Ru—H complexes (Figure S12). Aqueous work-up on this sample affords **23** in 42% isolated yield. Therefore, because these  $\kappa^1$ -Ru—H complexes convert to **23**, they must be covalently bound to borazine, because it is the only plausible source of NH<sub>3</sub>.

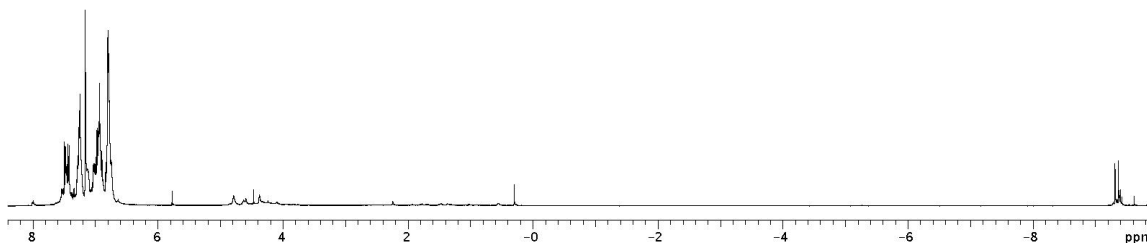

**Figure S12.** <sup>1</sup>H NMR taken in benzene-*d*<sub>5</sub> at 25 °C of a reaction between **12** and borazine after reaction completion and removal of the volatiles (mostly solvent and borazine) under vacuum.

Treatment of the data for **23**-catalyzed dehydrogenation is shown in Figure S13.

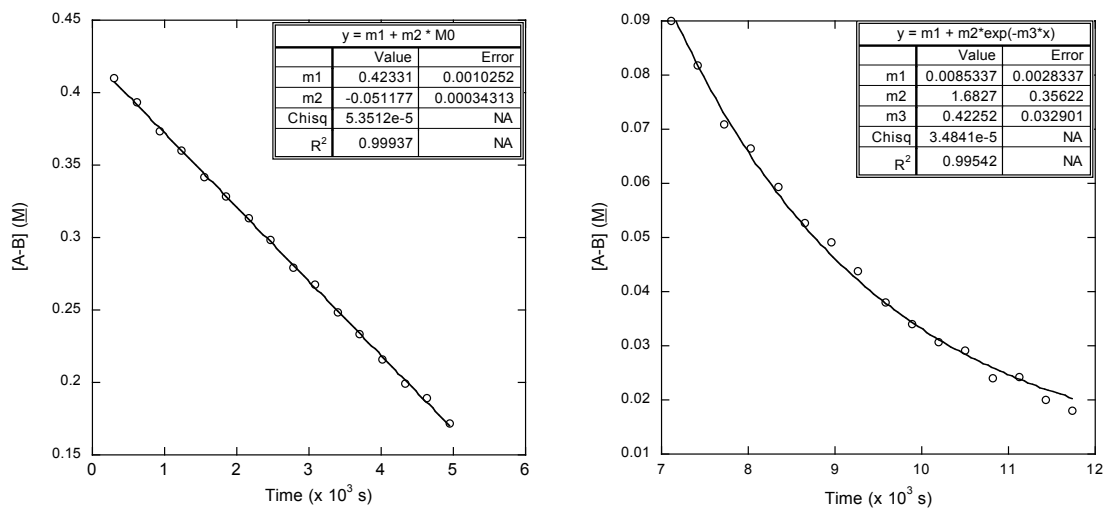

Fast catalysis, rate =  $5.12(3) \times 10^{-5} \text{ M s}^{-1}$

Slow catalysis case,  $k_{\text{obs}} = 4.23(33) \times 10^{-4} \text{ s}^{-1}$

**Figure S13.** [AB] vs. time for kinetic run monitored by <sup>11</sup>B NMR with 5 mol % **23** in 2:1 diglyme/benzene-*d*<sub>6</sub> at 70 °C. The slope in the linear plot represents reaction rate, and the exponential coefficient in the exponential decay plot represent  $k_{\text{obs}}$ .

### I. 1,10-Phenanthroline Poisoning Kinetics.

Figure S14 shows raw kinetics data for AB dehydrogenation in the presence of 0.5 and 0.1 molar equivalents 1,10-phenanthroline collected as described in the main text. A parallel run in which 7.7 mg ammonia borane (0.25 mmol) and 13.6 mg **13** (25  $\mu\text{mol}$ , 10 mol % versus AB) were dissolved in 0.6 mL 2:1 diglyme/ benzene- $d_6$  was also conducted as a control.

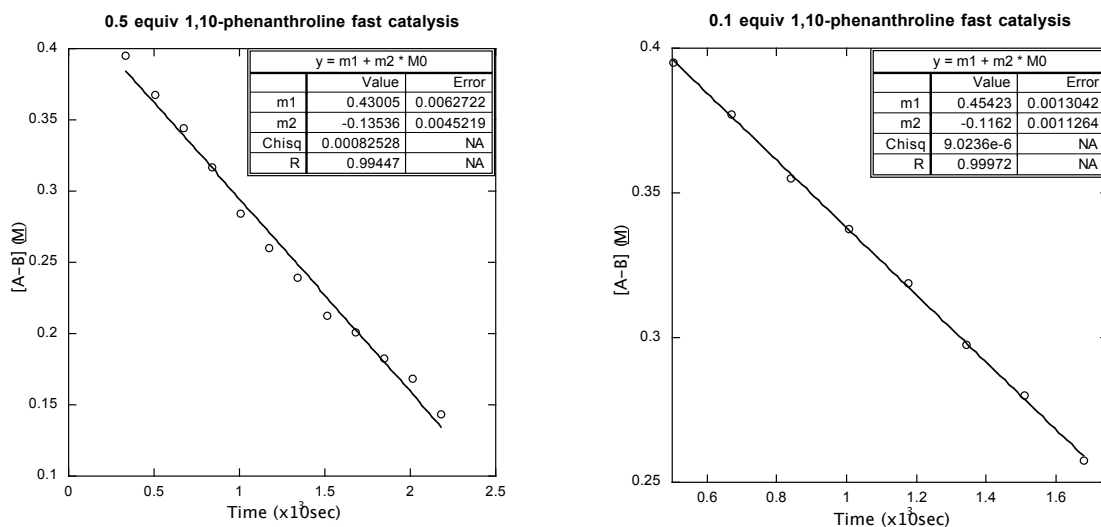

Conversion of AB in fast catalysis case: ca. 66%. Rate =  $1.35(5) \times 10^{-4} \text{ M s}^{-1}$

Conversion of AB in fast catalysis case: ca. 40%. Rate =  $1.16(1) \times 10^{-4} \text{ M s}^{-1}$

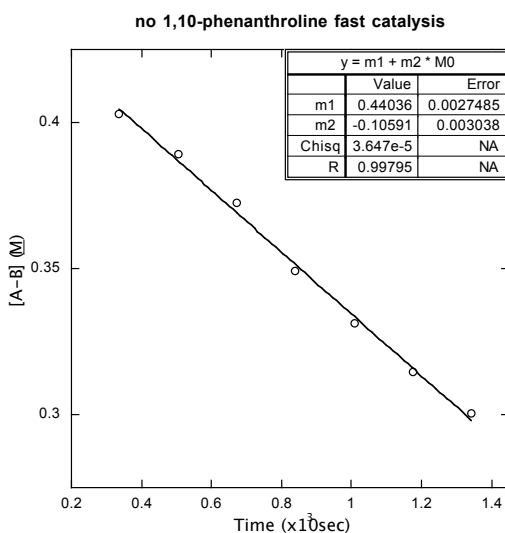

Conversion of AB in fast catalysis case: ca. 28%. Rate =  $1.06(3) \times 10^{-4} \text{ M s}^{-1}$

**Figure S14.** [AB] vs. time for kinetic runs monitored by  $^{11}\text{B}$  NMR. The slope in the linear plots represents reaction rate, and the exponential coefficient in the exponential decay plots represent  $k_{\text{obs}}$ .



Scheme S2 suggests a possible explanation for observation that phenanthroline accelerates catalysis. Conceptually, we speculate that phenanthroline is protecting the reactive site on ruthenium from hydroboration. This can enable a hydrogen bond from **28**'s ligand oxygen to ammonia borane, analogous to those well documented for imine reduction with the Shvo system.<sup>4</sup> We suspect the reaction process is akin to **23** catalyzed ammonia borane dehydrogenation, however the equilibrium between **17** and **28** is slower (versus the equilibrium between **17** and **23**) and thus enables a faster catalysis mechanism.

**Scheme S2.** Proposed Mechanism of Phenanthroline Protecting **17**.

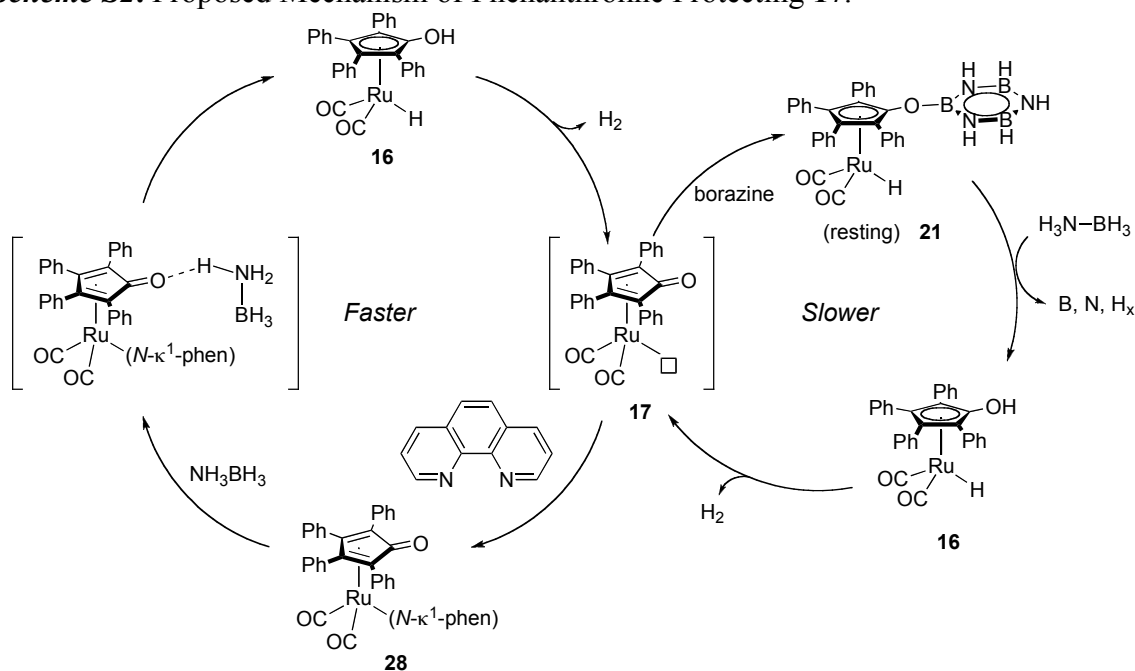

Fractional poisoning on **26**-catalyzed ammonia borane dehydrogenation with 1,10-phenanthroline was also conducted. **26** was prepared in situ by dissolving 6.8 mg **18** (12  $\mu\text{mol}$ ) and 1.2  $\mu\text{L}$  catechol borane in a 0.6 mL 2:1 diglyme/benzene- $d_6$  solution and heated at 55  $^\circ\text{C}$  for 30 min. The resulting solution was checked by  $^1\text{H}$ -NMR before proceeding to next step. Ammonia borane (7.7 mg, 0.25 mmol) and 2.2 mg (12  $\mu\text{mol}$ , 50 mol % versus **26**) were then added to this solution and dehydrogenation was started and monitored at 70  $^\circ\text{C}$ . AB consumption throughout the duration of the reaction was determined using  $^{11}\text{B}$  NMR and is shown in Figure S15. These data show that although the rate is not proportionally affected by the presence of phenanthroline, so the reaction is most likely homogeneous.

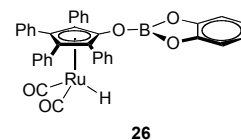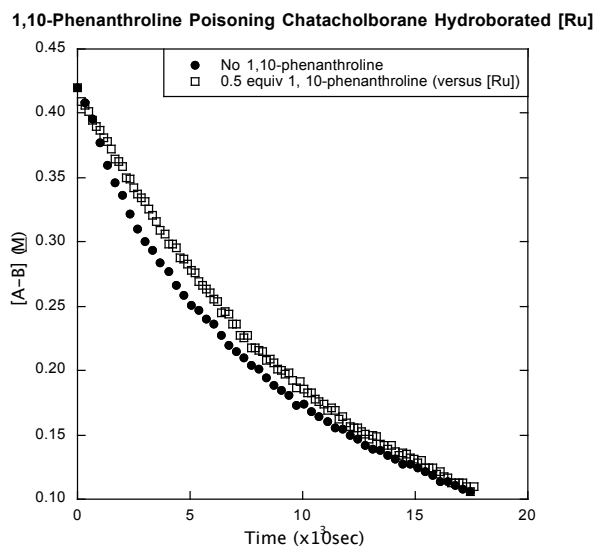

**Figure S15.** [AB] vs. time for kinetic runs monitored by  $^{11}\text{B}$  NMR. 1,10-phenanthroline doesn't impact the reaction rate significantly.

#### IV. References

1. Wildeman, T.; Sneddon, L. G. *Inorg. Chem.* **1995**, *34*, 1002-1003.
2. Koren-Selfridge, L.; Query, I. P.; Hanson, J. A.; Isley, N. A.; Guzei, I. A.; Clark, T. B. *Organometallics* **2010**, *29*, 3896-3900.
3. Hollmann, D.; Jiao, H.; Spannenberg, A.; Bähn, S.; Tillack, A.; Parton, R.; Altink, R.; Beller, M. *Organometallics* **2009**, *28*, 473-479.
4. (a) Samec, J. S.; Éll, A. H; Åberg, J. B.; Privalov, T.; Eriksson, L.; Bäckvall, J.-E. *J. Am. Chem. Soc.* **2006**, *128*, 14293. (b) Casey, C. P.; Johnson, J. B. *J. Am. Chem. Soc.* **2005**, *127*, 1883. (c) Samec, J. S.; Éll, A. H; Bäckvall, J.-E. *Chem. Commun.* **2004**, 2748. (d) Éll, A. H; Johnson, J. B.; Bäckvall, J.-E. *Chem. Commun.* **2003**, 1652. (e) Casey, C. P.; Bikzhanova, G. A.; Cui, Q.; Guzei, I.A. *J. Am. Chem. Soc.* **2005**, *127*, 14062. (f) Casey, C. P.; Clark, T. B.; Guzei, I. A. *J. Am. Chem. Soc.* **2007**, *129*, 11821. (g) Åberg, J. B.; Bäckvall, J.-E. *Chem. Eur. J.* **2008**, *14*, 9169.

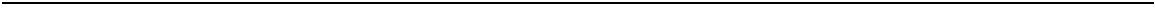

Supplement: NIHMS404425-supplement-1_si_001.pdf [file NIHMS404425-supplement-1_si_001.pdf]
